# Supplementary material
Source: HighWire-hosted journal article supplement (https://gh.bmj.com/content/4/4/e001333)
Supplement: inline-supplementary-material-2 [file inline-supplementary-material-2.pdf]

Re: BMJGH-2018-001333 - "Scale and implications of delivering multiple interventions through Integrated Child Health Events"—  
Kamatsuchi, Gheorghe, Balabanova.

APPENDICES

Appendix 1. Results of sensitivity analyses

(See Appendix 5 for Description of regression specifications)

|                                                     | <i>Dependent variable:</i>                                          |                 |                |                 |                 |                |                 |                 |                   |
|-----------------------------------------------------|---------------------------------------------------------------------|-----------------|----------------|-----------------|-----------------|----------------|-----------------|-----------------|-------------------|
|                                                     | Vit A coverage (%), only observations with <b>coverage &gt; 40%</b> |                 |                |                 |                 |                |                 |                 |                   |
|                                                     | Base                                                                | OLS             | FE             | FE2w            | FE2w+           | RE             | RE2w+           | WB              | WB+               |
|                                                     | (1)                                                                 | (2)             | (3)            | (4)             | (5)             | (6)            | (7)             | (8)             | (9)               |
| # interventions                                     | -0.22<br>(0.55)                                                     | -0.25<br>(0.45) | 0.02<br>(0.49) | -0.45<br>(0.50) | -0.33<br>(0.44) | 0.03<br>(0.57) | -0.06<br>(0.61) |                 |                   |
| log Govt health expenditure per capita (IntUSD)     |                                                                     |                 |                |                 | -1.55           |                | -1.82<br>(1.35) |                 |                   |
| log External health expenditure per capita (IntUSD) |                                                                     |                 |                |                 | 3.30            |                | 3.20*<br>(1.79) |                 |                   |
| log total population <5y                            |                                                                     |                 |                |                 | -30.94          |                | 1.28<br>(1.09)  |                 |                   |
| Average nurse and midwife density                   |                                                                     |                 |                |                 |                 |                | 0.02<br>(0.06)  |                 | 0.02<br>(0.07)    |
| Average # interventions (country)                   |                                                                     |                 |                |                 |                 |                |                 | -0.26<br>(1.18) | -2.81**<br>(1.31) |
| Difference from average # interventions (country)   |                                                                     |                 |                |                 |                 |                |                 | -0.02<br>(0.48) | 0.02<br>(0.55)    |

|                                                                    |                             |                    |                    |                    |                     |           |          |          |          |         |
|--------------------------------------------------------------------|-----------------------------|--------------------|--------------------|--------------------|---------------------|-----------|----------|----------|----------|---------|
| Average log Govt health expenditure per capita                     |                             |                    |                    |                    |                     |           |          |          |          | -2.93*  |
|                                                                    |                             |                    |                    |                    |                     |           |          |          |          | (1.53)  |
| Difference from average log Govt health expenditure per capita     |                             |                    |                    |                    |                     |           |          |          |          | 1.13    |
|                                                                    |                             |                    |                    |                    |                     |           |          |          |          | (3.74)  |
| Average log External health expenditure per capita                 |                             |                    |                    |                    |                     |           |          |          |          | 2.61    |
|                                                                    |                             |                    |                    |                    |                     |           |          |          |          | (1.95)  |
| Difference from average log External health expenditure per capita |                             |                    |                    |                    |                     |           |          |          |          | 4.21**  |
|                                                                    |                             |                    |                    |                    |                     |           |          |          |          | (2.00)  |
| Average log total population <5y                                   |                             |                    |                    |                    |                     |           |          |          |          | 1.45    |
|                                                                    |                             |                    |                    |                    |                     |           |          |          |          | (1.01)  |
| Difference from average log total population <5y                   |                             |                    |                    |                    |                     |           |          |          |          | 9.16    |
|                                                                    |                             |                    |                    |                    |                     |           |          |          |          | (17.45) |
| Constant                                                           | 85.85***                    | 87.92              |                    |                    |                     | 84.79***  | 66.97*** | 85.92*** | 80.58*** |         |
|                                                                    | (2.70)                      |                    |                    |                    |                     | (2.80)    | (19.08)  | (5.12)   | (17.44)  |         |
| Observations                                                       | 556                         | 556                | 556                | 556                | 524                 | 556       | 419      | 556      | 418      |         |
| R <sup>2</sup>                                                     | 0.001                       | 0.001              | 0.0000             | 0.004              | 0.02                | 0.20      | 0.03     | 0.004    | 0.09     |         |
| Adjusted R <sup>2</sup>                                            | -0.001                      | -0.001             | -0.15              | -0.17              | -0.17               | 0.20      | 0.02     | 0.0005   | 0.07     |         |
| F Statistic                                                        | -9.24                       | 0.53 (df = 1; 554) | 0.01 (df = 1; 482) | 2.02 (df = 1; 471) | 2.13* (df = 4; 440) | 122.41*** | 5.83     | -9.37    | 35.14*** |         |
| Note:                                                              | *p<0.1; **p<0.05; ***p<0.01 |                    |                    |                    |                     |           |          |          |          |         |

|                                                                | <i>Dependent variable:</i>                                          |                 |                |                 |                |                |                 |                 |                  |
|----------------------------------------------------------------|---------------------------------------------------------------------|-----------------|----------------|-----------------|----------------|----------------|-----------------|-----------------|------------------|
|                                                                | Vit A coverage (%), only observations with <b>coverage &gt; 60%</b> |                 |                |                 |                |                |                 |                 |                  |
|                                                                | Base                                                                | OLS             | FE             | FE2w            | FE2w+          | RE             | RE2w+           | WB              | WB+              |
|                                                                | (1)                                                                 | (2)             | (3)            | (4)             | (5)            | (6)            | (7)             | (8)             | (9)              |
| # interventions                                                | 0.02<br>(0.55)                                                      | -0.40<br>(0.45) | 0.25<br>(0.49) | -0.08<br>(0.50) | 0.05<br>(0.44) | 0.12<br>(0.57) | 0.22<br>(0.61)  |                 |                  |
| log Govt health expenditure per capita (IntUSD)                |                                                                     |                 |                |                 | -3.03          |                | -1.48<br>(1.35) |                 |                  |
| log External health expenditure per capita (IntUSD)            |                                                                     |                 |                |                 | 4.10           |                | 3.31*<br>(1.79) |                 |                  |
| log total population <5y                                       |                                                                     |                 |                |                 | 1.54           |                | 0.41<br>(1.09)  |                 |                  |
| Average nurse and midwife density                              |                                                                     |                 |                |                 |                |                | 0.01<br>(0.06)  |                 | -0.02<br>(0.07)  |
| Average # interventions (country)                              |                                                                     |                 |                |                 |                |                |                 | -1.40<br>(1.18) | -2.32*<br>(1.31) |
| Difference from average # interventions (country)              |                                                                     |                 |                |                 |                |                |                 | 0.16<br>(0.48)  | 0.25<br>(0.55)   |
| Average log Govt health expenditure per capita                 |                                                                     |                 |                |                 |                |                |                 |                 | -1.48<br>(1.53)  |
| Difference from average log Govt health expenditure per capita |                                                                     |                 |                |                 |                |                |                 |                 | -0.85<br>(3.74)  |
| Average log External health expenditure per capita             |                                                                     |                 |                |                 |                |                |                 |                 | 1.76<br>(1.95)   |

|                                                                    |          |                    |                    |                    |                       |           |          |          |          |
|--------------------------------------------------------------------|----------|--------------------|--------------------|--------------------|-----------------------|-----------|----------|----------|----------|
| Difference from average log External health expenditure per capita |          |                    |                    |                    |                       |           |          |          | 4.98**   |
|                                                                    |          |                    |                    |                    |                       |           |          |          | (2.00)   |
| Average log total population <5y                                   |          |                    |                    |                    |                       |           |          |          | 0.53     |
|                                                                    |          |                    |                    |                    |                       |           |          |          | (1.01)   |
| Difference from average log total population <5y                   |          |                    |                    |                    |                       |           |          |          | 11.03    |
|                                                                    |          |                    |                    |                    |                       |           |          |          | (17.45)  |
| Constant                                                           | 88.73*** | 91.74              |                    |                    |                       | 88.35***  | 79.32*** | 94.21*** | 91.75*** |
|                                                                    | (2.70)   |                    |                    |                    |                       | (2.80)    | (19.08)  | (5.12)   | (17.44)  |
| Observations                                                       | 509      | 509                | 509                | 509                | 481                   | 509       | 396      | 509      | 395      |
| R <sup>2</sup>                                                     | 0.005    | 0.005              | 0.002              | 0.0002             | 0.04                  | 0.41      | 0.01     | 0.03     | 0.10     |
| Adjusted R <sup>2</sup>                                            | 0.003    | 0.003              | -0.16              | -0.19              | -0.16                 | 0.41      | 0.001    | 0.03     | 0.08     |
| F Statistic                                                        | -9.74    | 2.50 (df = 1; 507) | 1.04 (df = 1; 438) | 0.10 (df = 1; 427) | 3.73*** (df = 4; 399) | 325.33*** | -15.31   | 5.85*    | 36.76*** |

Note:

\*p<0.1; \*\*p<0.05; \*\*\*p<0.01

|                                                                | <i>Dependent variable:</i>                                          |                 |                 |                 |                 |                 |                 |                 |                 |
|----------------------------------------------------------------|---------------------------------------------------------------------|-----------------|-----------------|-----------------|-----------------|-----------------|-----------------|-----------------|-----------------|
|                                                                | Vit A coverage (%), only observations with <b>coverage &gt; 80%</b> |                 |                 |                 |                 |                 |                 |                 |                 |
|                                                                | Base                                                                | OLS             | FE              | FE2w            | FE2w+           | RE              | RE2w+           | WB              | WB+             |
|                                                                | (1)                                                                 | (2)             | (3)             | (4)             | (5)             | (6)             | (7)             | (8)             | (9)             |
| # interventions                                                | -0.17<br>(0.55)                                                     | -0.30<br>(0.45) | -0.10<br>(0.49) | -0.28<br>(0.50) | -0.24<br>(0.44) | -0.13<br>(0.57) | -0.09<br>(0.61) |                 |                 |
| log Govt health expenditure per capita (IntUSD)                |                                                                     |                 |                 |                 | -1.44           |                 | -0.67<br>(1.35) |                 |                 |
| log External health expenditure per capita (IntUSD)            |                                                                     |                 |                 |                 | 2.31            |                 | 1.11<br>(1.79)  |                 |                 |
| log total population <5y                                       |                                                                     |                 |                 |                 | -3.89           |                 | 0.23<br>(1.09)  |                 |                 |
| Average nurse and midwife density                              |                                                                     |                 |                 |                 |                 |                 | -0.01<br>(0.06) |                 | -0.01<br>(0.07) |
| Average # interventions (country)                              |                                                                     |                 |                 |                 |                 |                 |                 | -0.42<br>(1.18) | -0.47<br>(1.31) |
| Difference from average # interventions (country)              |                                                                     |                 |                 |                 |                 |                 |                 | -0.15<br>(0.48) | -0.11<br>(0.55) |
| Average log Govt health expenditure per capita                 |                                                                     |                 |                 |                 |                 |                 |                 |                 | -0.82<br>(1.53) |
| Difference from average log Govt health expenditure per capita |                                                                     |                 |                 |                 |                 |                 |                 |                 | -0.17<br>(3.74) |
| Average log External health expenditure per capita             |                                                                     |                 |                 |                 |                 |                 |                 |                 | 0.99<br>(1.95)  |

|                                                                    |                    |                        |                       |                       |                        |                    |                     |                    |                     |
|--------------------------------------------------------------------|--------------------|------------------------|-----------------------|-----------------------|------------------------|--------------------|---------------------|--------------------|---------------------|
| Difference from average log External health expenditure per capita |                    |                        |                       |                       |                        |                    |                     |                    | 1.29<br>(2.00)      |
| Average log total population <5y                                   |                    |                        |                       |                       |                        |                    |                     |                    | 0.26<br>(1.01)      |
| Difference from average log total population <5y                   |                    |                        |                       |                       |                        |                    |                     |                    | 5.43<br>(17.45)     |
| Constant                                                           | 93.85***<br>(2.70) | 95.19                  |                       |                       |                        | 93.71***<br>(2.80) | 90.04***<br>(19.08) | 94.80***<br>(5.12) | 91.96***<br>(17.44) |
| Observations                                                       | 421                | 421                    | 421                   | 421                   | 398                    | 421                | 327                 | 421                | 326                 |
| R <sup>2</sup>                                                     | 0.01               | 0.01                   | 0.001                 | 0.01                  | 0.03                   | 0.78               | 0.02                | 0.01               | 0.03                |
| Adjusted R <sup>2</sup>                                            | 0.01               | 0.01                   | -0.18                 | -0.21                 | -0.20                  | 0.78               | 0.01                | 0.01               | 0.005               |
| F Statistic                                                        | -6.53              | 3.80* (df = 1;<br>419) | 0.44 (df = 1;<br>355) | 2.69 (df = 1;<br>344) | 2.34* (df = 4;<br>321) | 1,418.02***        | 1.54                | -4.16              | 5.58                |

Note:

\*p<0.1; \*\*p<0.05; \*\*\*p<0.01

|                                                     | <i>Dependent variable:</i>                                                    |                      |                     |                       |                    |                     |                     |                     |
|-----------------------------------------------------|-------------------------------------------------------------------------------|----------------------|---------------------|-----------------------|--------------------|---------------------|---------------------|---------------------|
|                                                     | Measles vaccine coverage (%), only observations with <b>coverage &gt; 40%</b> |                      |                     |                       |                    |                     |                     |                     |
|                                                     | Base                                                                          | OLS                  | FE                  | FE2w                  | FE2w+              | RE                  | RE2w+               | WB                  |
|                                                     | (1)                                                                           | (2)                  | (3)                 | (4)                   | (5)                | (6)                 | (7)                 | (8)                 |
| # interventions                                     | -1.78**<br>(0.91)                                                             | -1.82*<br>(1.06)     | -2.17<br>(1.99)     | -5.29**<br>(2.32)     | -3.62***<br>(0.88) | -1.78*<br>(0.91)    | -1.24<br>(1.04)     |                     |
| log Govt health expenditure per capita (IntUSD)     |                                                                               |                      |                     |                       | -11.02             |                     | -0.94<br>(1.22)     |                     |
| log External health expenditure per capita (IntUSD) |                                                                               |                      |                     |                       | -2.46              |                     | -0.21<br>(1.91)     |                     |
| log total population <5y                            |                                                                               |                      |                     |                       | 28.59              |                     | 0.46<br>(1.33)      |                     |
| Average # interventions (country)                   |                                                                               |                      |                     |                       |                    |                     |                     | -2.19<br>(1.67)     |
| Difference from average # interventions (country)   |                                                                               |                      |                     |                       |                    |                     |                     | -1.64<br>(1.29)     |
| Constant                                            | 100.86***<br>(3.67)                                                           | 101.04               |                     |                       |                    | 100.86***<br>(3.68) | 96.16***<br>(19.95) | 102.35***<br>(5.71) |
| Observations                                        | 77                                                                            | 77                   | 77                  | 77                    | 72                 | 77                  | 72                  | 77                  |
| R <sup>2</sup>                                      | 0.12                                                                          | 0.12                 | 0.21                | 0.40                  | 0.38               | 0.42                | 0.08                | 0.12                |
| Adjusted R <sup>2</sup>                             | 0.10                                                                          | 0.10                 | -1.42               | -1.87                 | -3.37              | 0.41                | 0.03                | 0.09                |
| F Statistic                                         | 9.83***                                                                       | 9.83*** (df = 1; 75) | 6.46** (df = 1; 25) | 10.46*** (df = 1; 16) | 1.56 (df = 4; 10)  | 53.46***            | 6.09                | 9.81***             |

Note:

\* p<0.1; \*\* p<0.05; \*\*\* p<0.01

| <i>Dependent variable:</i>                                                    |           |          |              |                    |                    |                  |          |          |          |
|-------------------------------------------------------------------------------|-----------|----------|--------------|--------------------|--------------------|------------------|----------|----------|----------|
| Measles vaccine coverage (%), only observations with <b>coverage &gt; 60%</b> |           |          |              |                    |                    |                  |          |          |          |
|                                                                               | Base      | OLS      | FE           | FE2w               | FE2w+              | RE               | RE2w+    | WB       |          |
|                                                                               | (1)       | (2)      | (3)          | (4)                | (5)                | (6)              | (7)      | (8)      |          |
| # interventions                                                               | -1.61*    | -1.67*   | -1.45        | -3.20**            | -0.23              | -1.60*           | -1.21*   |          |          |
|                                                                               | (0.87)    | (0.92)   | (1.47)       | (1.56)             | (0.83)             | (0.88)           | (0.65)   |          |          |
| log Govt health expenditure per capita (IntUSD)                               |           |          |              |                    | -6.14              |                  | -0.25    |          |          |
|                                                                               |           |          |              |                    |                    |                  | (0.76)   |          |          |
| log External health expenditure per capita (IntUSD)                           |           |          |              |                    | -2.41              |                  | 0.14     |          |          |
|                                                                               |           |          |              |                    |                    |                  | (1.67)   |          |          |
| log total population <5y                                                      |           |          |              |                    | -85.16             |                  | 1.43*    |          |          |
|                                                                               |           |          |              |                    |                    |                  | (0.85)   |          |          |
| Average # interventions (country)                                             |           |          |              |                    |                    |                  |          | -0.74    |          |
|                                                                               |           |          |              |                    |                    |                  |          | (1.13)   |          |
| Difference from average # interventions (country)                             |           |          |              |                    |                    |                  |          | -2.02**  |          |
|                                                                               |           |          |              |                    |                    |                  |          | (0.93)   |          |
| Constant                                                                      | 101.08*** | 101.29   |              |                    |                    | 101.04***        | 79.89*** | 97.98*** |          |
|                                                                               | (3.30)    |          |              |                    |                    | (3.33)           | (14.88)  | (4.30)   |          |
| Observations                                                                  | 75        | 75       | 75           | 75                 | 70                 | 75               | 70       | 75       |          |
| R <sup>2</sup>                                                                | 0.14      | 0.14     | 0.13         | 0.21               | 0.22               | 0.42             | 0.17     | 0.16     |          |
| Adjusted R <sup>2</sup>                                                       | 0.13      | 0.13     | -1.67        | -2.89              | -4.94              | 0.41             | 0.11     | 0.14     |          |
| F Statistic                                                                   | 12.25***  | 12.27*** | (df = 1; 73) | 3.74* (df = 1; 24) | 4.00* (df = 1; 15) | 0.65 (df = 4; 9) | 52.92*** | 12.87**  | 13.80*** |

Note:

\*p<0.1; \*\*p<0.05; \*\*\*p<0.01



| <i>Dependent variable:</i>                                                    |                    |                   |                   |                   |                    |                    |                     |                    |
|-------------------------------------------------------------------------------|--------------------|-------------------|-------------------|-------------------|--------------------|--------------------|---------------------|--------------------|
| Measles vaccine coverage (%), only observations with <b>coverage &gt; 80%</b> |                    |                   |                   |                   |                    |                    |                     |                    |
|                                                                               | Base               | OLS               | FE                | FE2w              | FE2w+              | RE                 | RE2w+               | WB                 |
|                                                                               | (1)                | (2)               | (3)               | (4)               | (5)                | (6)                | (7)                 | (8)                |
| # interventions                                                               | -0.55<br>(0.41)    | -0.55<br>(0.42)   | -0.55<br>(0.50)   | -0.62<br>(0.74)   | -1.05***<br>(0.36) | -0.55<br>(0.41)    | -0.65<br>(0.41)     |                    |
| log Govt health expenditure per capita (IntUSD)                               |                    |                   |                   |                   | 0.62               |                    | -0.13<br>(0.56)     |                    |
| log External health expenditure per capita (IntUSD)                           |                    |                   |                   |                   | 5.01               |                    | 2.50***<br>(0.80)   |                    |
| log total population <5y                                                      |                    |                   |                   |                   | 44.01              |                    | 1.31**<br>(0.64)    |                    |
| Average # interventions (country)                                             |                    |                   |                   |                   |                    |                    |                     | -0.35<br>(0.75)    |
| Difference from average # interventions (country)                             |                    |                   |                   |                   |                    |                    |                     | -0.60<br>(0.43)    |
| Constant                                                                      | 98.08***<br>(1.43) | 98.13             |                   |                   |                    | 98.08***<br>(1.44) | 73.74***<br>(10.12) | 97.34***<br>(2.61) |
| Observations                                                                  | 69                 | 69                | 69                | 69                | 66                 | 69                 | 66                  | 69                 |
| R <sup>2</sup>                                                                | 0.04               | 0.04              | 0.09              | 0.05              | 0.30               | 0.88               | 0.16                | 0.04               |
| Adjusted R <sup>2</sup>                                                       | 0.02               | 0.02              | -2.08             | -4.85             | -5.48              | 0.87               | 0.11                | 0.01               |
| F Statistic                                                                   | 2.49               | 2.50 (df = 1; 67) | 2.06 (df = 1; 20) | 0.62 (df = 1; 11) | 0.76 (df = 4; 7)   | 471.08***          | 10.65**             | 2.43               |

Note:

\*p<0.1; \*\*p<0.05; \*\*\*p<0.01

**Appendix 2. Number of countries delivering multiple interventions, by year**

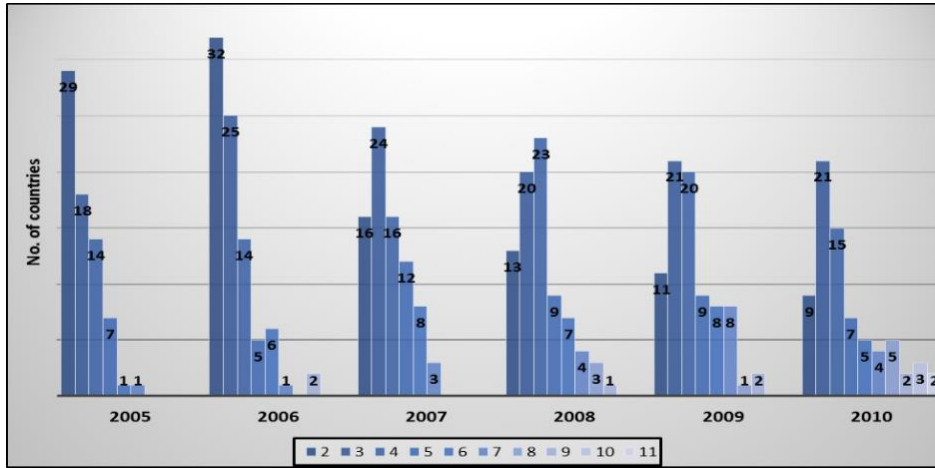

**Appendix 3. Distribution of vitamin A coverage in ICHes, global (2005–2010)**

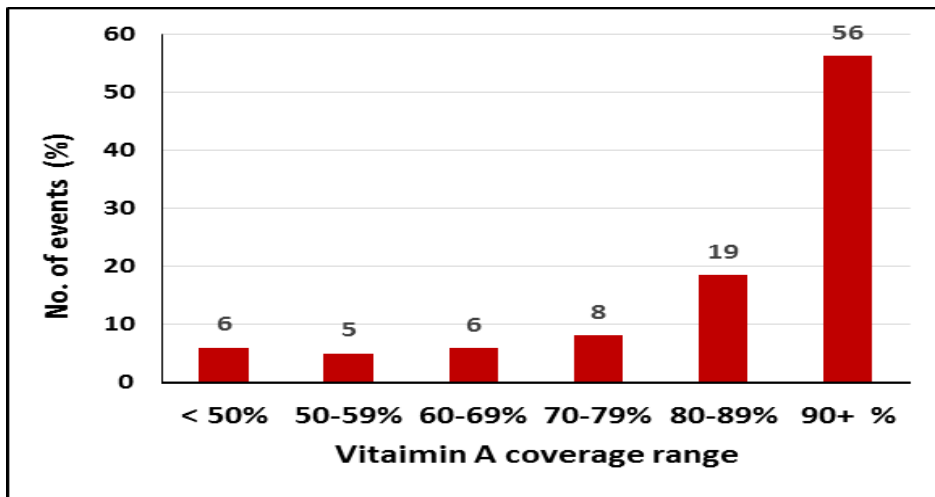

**Appendix 4. Median measles coverage by number of interventions, 2005–2010 (n=79)**

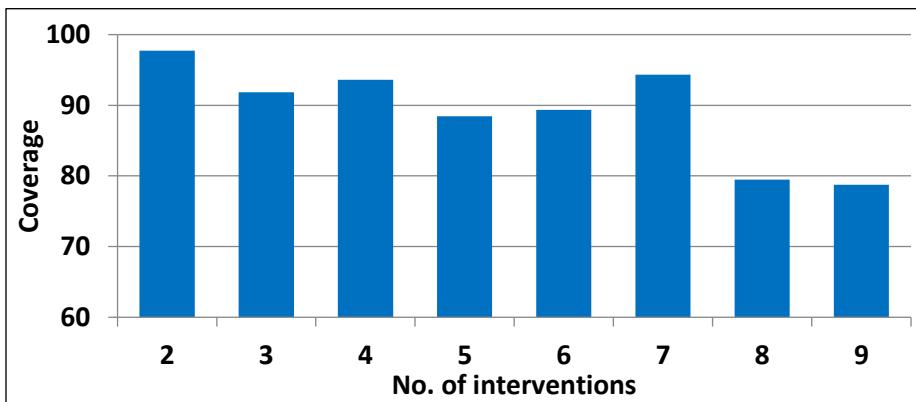

## Appendix 5. Description of regression specifications

- “Base”: panel regression with country-level random effects and time effects
- “OLS”: simple ordinary least squares regression that pools all the data together and ignores the country and year structure of the dataset, assuming every data point is independent of the others; exploratory only.
- “FE” (fixed effects): panel regression with country fixed effects and no time effects;
- “FE2w” (fixed effects two-way): panel regression with country fixed effects and time effects;
- “FE2w+”: model FE2w with additional predictors;
- “RE” (random effects): panel regression with country random effects and no time effects;
- “RE2w+” (random effects two-way): Base model with additional predictors;
- “WB” (within-between): panel regression using the within-between estimator, whereby the number of interventions is modelled using two variables – the average number of interventions at country-level over the entire time interval (variable “*Average # interventions (country)*”) and the demeaned number of interventions, i.e. difference between each value and the country-level average number of interventions (variable “*Difference from average # interventions (country)*”).
- “WB+”: model WB with additional predictors, also modelled as country average and demeaned values.

The additional country-level predictors used in models FE2w+, RE2w+ and WB+ are:

- Log Government health expenditure per capita (IntUSD): yearly values downloaded from the WHO Global Health Expenditure Database
- Log External health expenditure per capita (IntUSD): yearly values downloaded from the WHO Global Health Expenditure Database
- Log total population <5y: male and female population ages 00-04 downloaded from the World Bank DataBank portal (accessed 21 March 2019) <https://databank.worldbank.org/data/home.aspx> and aggregated to obtain the total yearly population with ages below 5 years.
- Average nurse and midwives density: density of nurses and midwives (per 10,000 population) downloaded from the WHO Global Health Workforce Statistics portal (accessed 21 March 2019) <http://apps.who.int/gho/data/node.main.HWFGRP?lang=en> and averaged at country-level over the 2004-2010 interval because of large cross-country variability in data completeness. Included in regressions as fixed over time.

In all regression results presented below standard errors are robust to heteroscedasticity and computed using the HC3 estimator

**Appendix 6. Key child health & nutrition interventions co-delivered during ICHEs (2005–2010)**

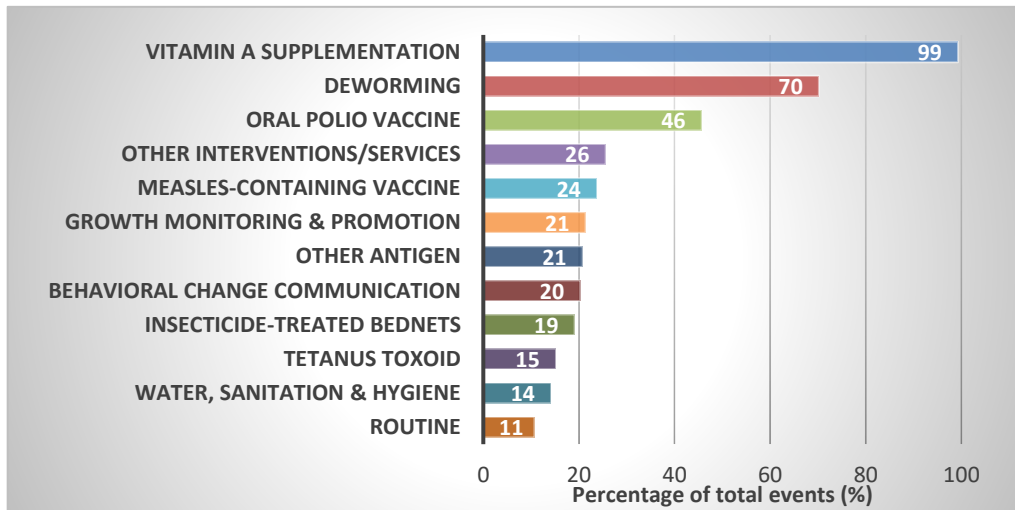

(Out of a total of 597 events)

- Percentage indicators show how frequent the intervention appeared in the total amount of events shown in the merged database.
- **Behaviour change communication** includes behaviour change communication message promotion regarding breastfeeding, diarrhoea prevention, HIV/AIDS awareness, consumption of iodized salt promotion, neonatal care, nutritional screening, birth registration, maternal health care, among others.
